# Supplementary material for: Disassembling the complexity of mucus barriers to develop a fast screening tool for early drug discovery
Source: Royal Society of Chemistry journal article supplement (doi:10.1039/c9tb00957d), 2019-01-01
Supplement: c9tb00957d1.pdf [file c9tb00957d1.pdf]

## Supplementary Information

**Table S1** – Available *in vitro* cell-free models found in the literature.

| Mucus Model                                                                                                                                                                              | Model Chemical Composition | Model Rheological Properties | Limitations                                                                                                                                                                                                                                         |
|------------------------------------------------------------------------------------------------------------------------------------------------------------------------------------------|----------------------------|------------------------------|-----------------------------------------------------------------------------------------------------------------------------------------------------------------------------------------------------------------------------------------------------|
| Sputum of Patients                                                                                                                                                                       | +                          | +                            | Poor reproducibility due to subject-to-subject variability.                                                                                                                                                                                         |
| Mucin-based solutions                                                                                                                                                                    |                            |                              |                                                                                                                                                                                                                                                     |
| 20, 30, or 50 mg/mL pig gastric mucins with sodium phosphate and sodium carbonate buffer <sup>20</sup>                                                                                   | +                          | -                            | This model does not consider the steric barrier.                                                                                                                                                                                                    |
| 5 mg/ml pig gastric mucin, 4 mg/ml DNA, 5.9 μL/ml diethylene triamine pentaacetic acid (DTPA), 5 mg/ml NaCl, 2.2 mg/ml KCl, 5 μL/ml egg yolk emulsion *                                  | +/-                        | -                            | These models include exogenous compounds, as DTPA or Tween 80 that may interact with drugs.                                                                                                                                                         |
| 4 mg/ml pig gastric mucin, 30 mg/ml lipid mixture, 31 mg/ml pig serum albumin, 5 mg/ml DNA, 0.75 %(v/v) Tween 80 <sup>22</sup>                                                           | +/-                        | -                            |                                                                                                                                                                                                                                                     |
| 3D Mucin-based structures                                                                                                                                                                |                            |                              |                                                                                                                                                                                                                                                     |
| Purified pig gastric mucus, 0.92 mg/ml calf thymus DNA, ~80 mg/ mL bovine serum albumin (BSA) <sup>9</sup>                                                                               | +/-                        | +/-                          | The viscoelastic properties and composition were different from those of CF sputum.<br><br>The model requires that the end-user performs mucus purification of pig gastric mucus, which entails complex steps and may lead to poor reproducibility. |
| 3 – 9 mg/ml PAA, 50 mg/ml pig gastric mucin, 31 mg/ml BSA, 6 – 30 mg/ml lipid mixture, polysorbate 80, 1.3 mM CaCl <sub>2</sub> , 1.0 mM MgSO <sub>4</sub> and 137 mM NaCl <sup>23</sup> | -                          | +                            | These models include exogenous compounds, as PAA, polysorbate 80, locust bean gum, sodium tetraborate or HEMA that may interact with drugs.                                                                                                         |
| 5 – 17 mg/ml locust bean gum and 0.1 M sodium tetraborate <sup>25</sup>                                                                                                                  | -                          | +                            |                                                                                                                                                                                                                                                     |
| Gels made of N-acryloyl-D-glucosamine (AGA) to mimic the neutral sugars of mucins copolymerised with 2-hydroxyethylmethacrylate (HEMA) in a proportion of either 20:80 or 30:70 %(v/v)   | -                          | Not known                    |                                                                                                                                                                                                                                                     |
| Proposed Mucus Model                                                                                                                                                                     | Model Chemical Composition | Model Rheological Properties | Advantages                                                                                                                                                                                                                                          |
| 25 mg/ml pig gastric mucin, 3 mg/ml alginate, 7.07 mg/ml, 1 mg/ml Ca <sup>2+</sup> ions                                                                                                  | +                          | +                            | The proposed model only includes components present in CF mucus, while modelling its rheological properties.                                                                                                                                        |

|  |  |  |                                                                                                                                                                            |
|--|--|--|----------------------------------------------------------------------------------------------------------------------------------------------------------------------------|
|  |  |  | <p>The model relies on commercially available products offering interlaboratory reproducibility.</p> <p>Does not require specific or complicated experimental set-ups.</p> |
|--|--|--|----------------------------------------------------------------------------------------------------------------------------------------------------------------------------|

\* S. Kirchner, J. L. Fothergill, E. A. Wright, C. E. James, E. Mowat, C. Winstanley. *J Vis Exp.*, 2012, **64**, 3857.

## Supplementary Information

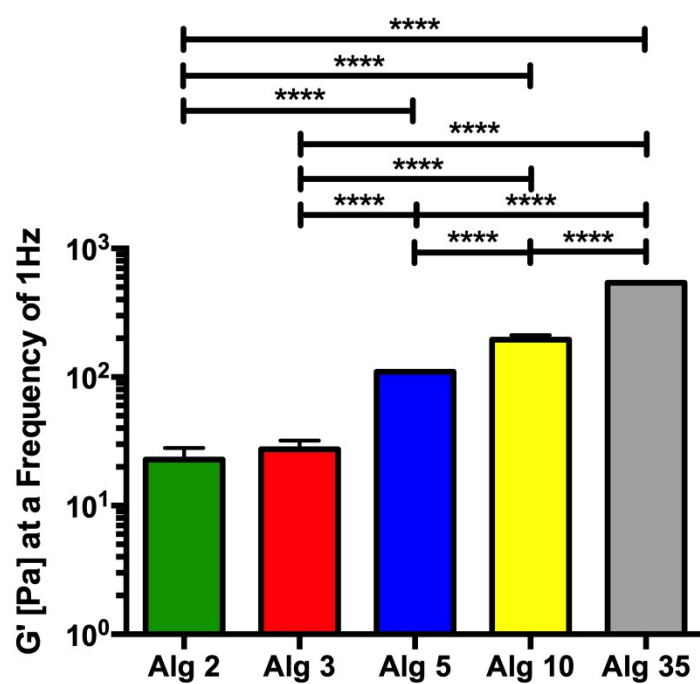

**Fig. S2** Storage modulus hydrogels made of different concentrations of Alg, including 2, 3, 5, 10 and 35 mg/ml at a frequency of 1 Hz. Significant differences were set for \* $p < 0.05$ ; \*\* $p < 0.01$ ; \*\*\* $p < 0.001$ ; \*\*\*\* $p < 0.0001$ .

## Supplementary Information

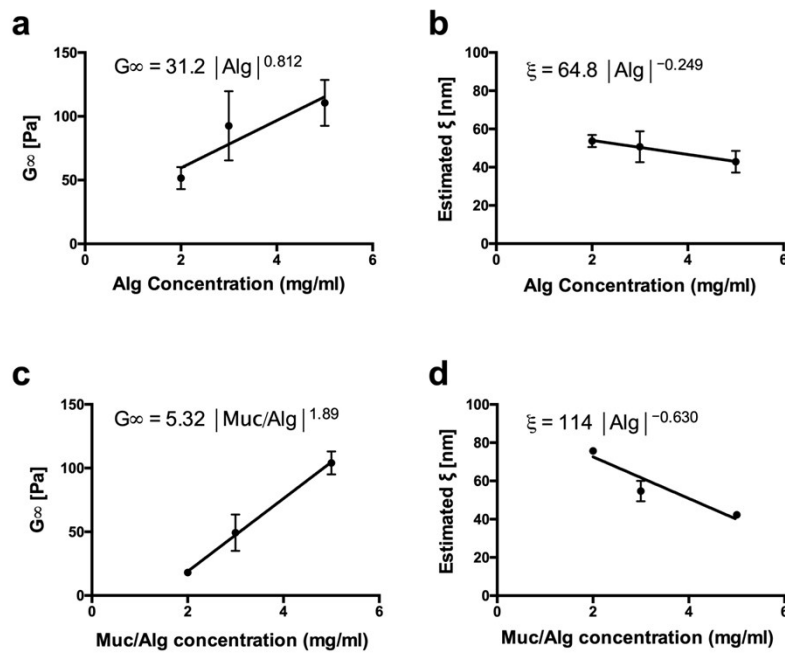

**Fig. S3** Mesh size ( $\xi$ ) and Shear Modulus ( $G$ ) after fitting the GMM on the obtained rheological data of the developed mucus models: (A) and (B) Alg-based hydrogels; (C) and (D) Mucin/Alg-based hydrogels.

## Supplementary Information

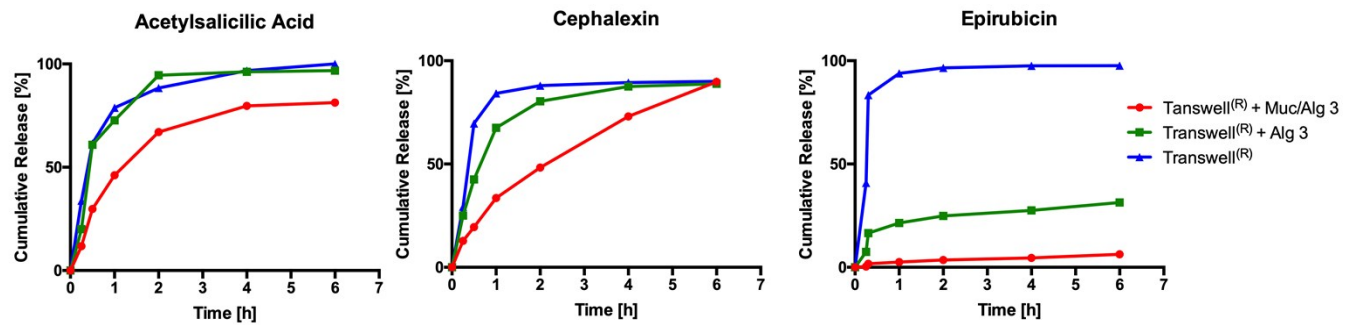

**Fig. S4** Drug diffusion tests through the developed airway mucus model. Cumulative release of acetylsalicylic acid, cephalixin and epirubicin through the empty Transwell<sup>®</sup> supports (blue line) and in the presence of either Alg 3 (green line) or Muc/Alg 3 hydrogels (red line). Acetylsalicylic acid diffusion through the Transwell<sup>®</sup> supports was performed using 50:50 % (v/v) ethanol/dH<sub>2</sub>O to avoid interactions with the Transwell<sup>®</sup> supports.
